# Supplementary material
Source: PubMed Central journal article supplement (PMC8684188)

**S3 Figure. Comparison: ivermectin vs. Standard of care; Outcome: mechanical ventilation; Analysis: subgroups by risk of bias classification.**

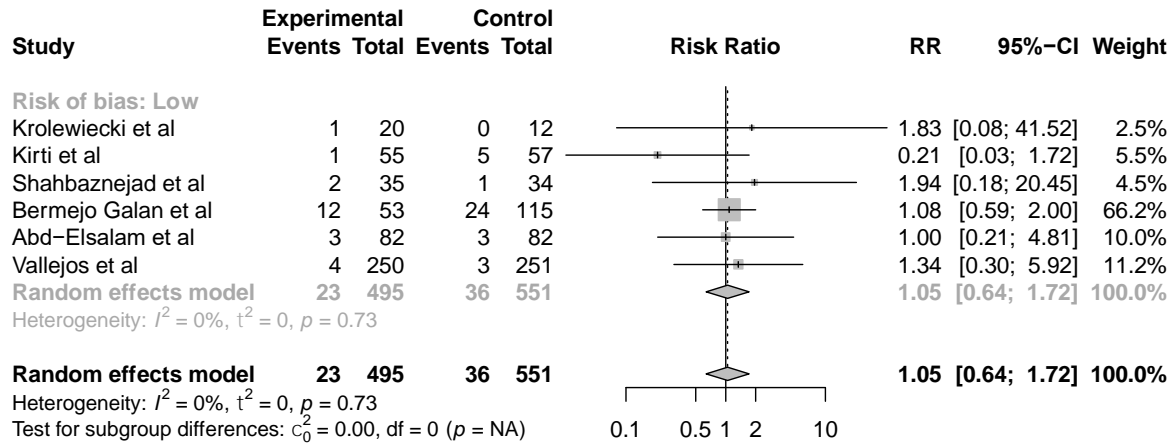

**S4 Figure. Comparison: ivermectin vs. Standard of care; Outcome: symptom resolution or improvement; Analysis: subgroups by risk of bias classification.**

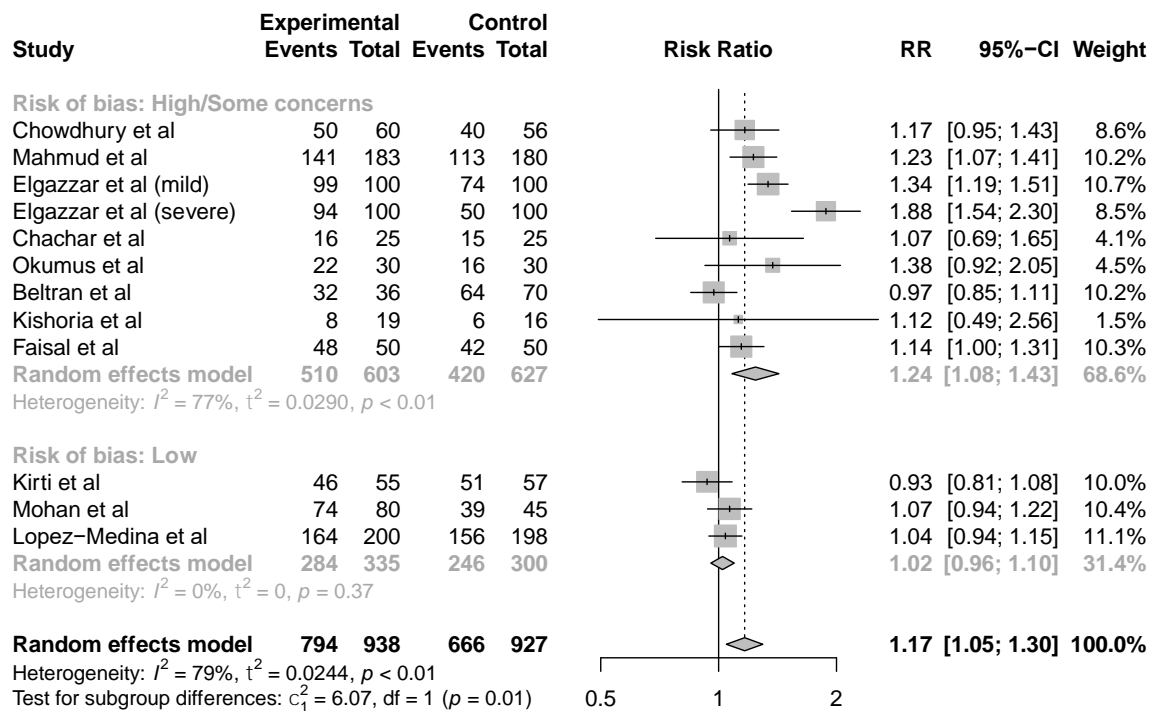

**S5 Figure. Comparison: ivermectin vs. Standard of care; Outcome: hospitalization; Analysis: subgroups by risk of bias classification.**

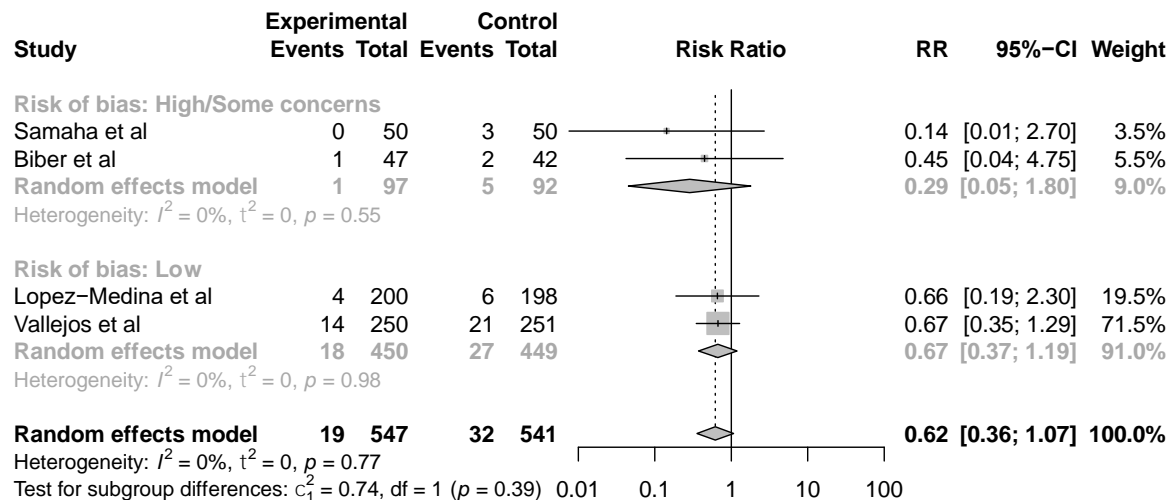

**S6 Figure. Comparison: ivermectin vs. Standard of care; Outcome: symptomatic infection; Analysis: subgroups by risk of bias classification.**

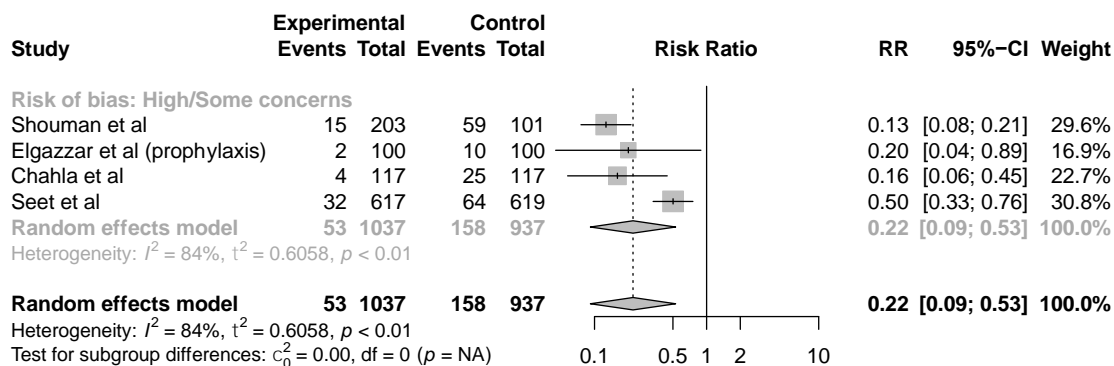

**S7 Figure. Comparison: ivermectin vs. Standard of care; Outcome: viral clearance; Analysis: subgroups by risk of bias classification.**

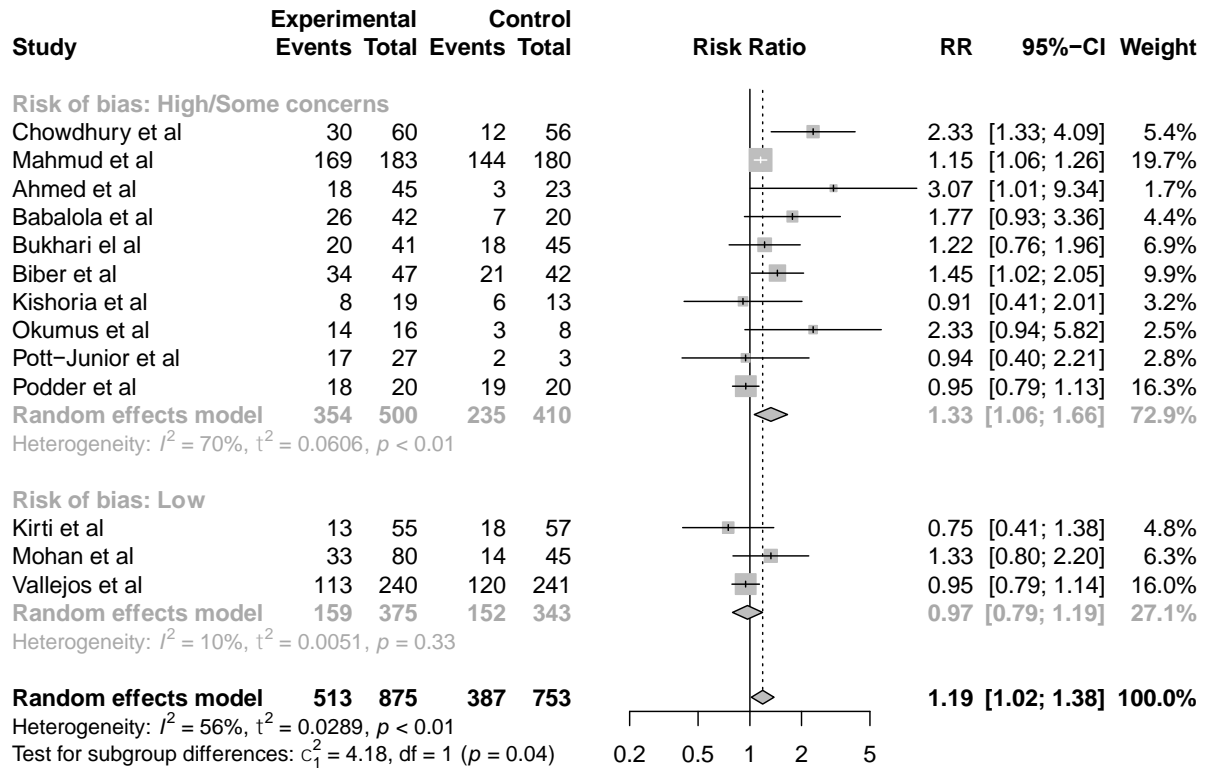

**S8 Figure. Comparison: ivermectin vs. Standard of care; Outcome: adverse events; Analysis: subgroups by risk of bias classification.**

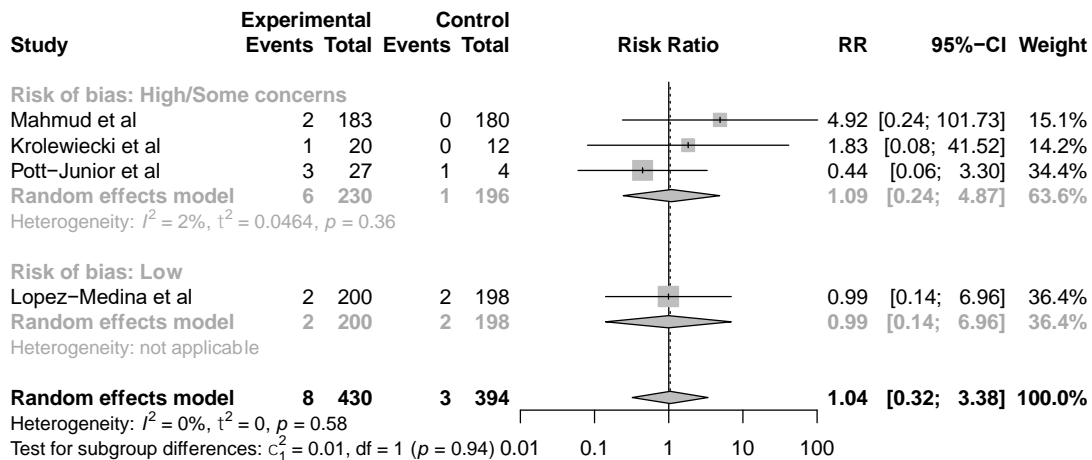

Supplement: mmc1.pdf [file mmc1.pdf]
