# Supplementary material
Source: PubMed Central journal article supplement (PMC8684188)
Supplement: mmc3.pdf [file mmc3.pdf]

**S1 Table. Included randomized controlled trials characteristics**

| Study                 | Publication status | Baseline severity                                    | N intervention group | N control group | Patients' characteristics                                                          | Intervention                                                                                    | Control                                                    | Standard of care (SOC) implemented                                                                                              | Additional interventions          |
|-----------------------|--------------------|------------------------------------------------------|----------------------|-----------------|------------------------------------------------------------------------------------|-------------------------------------------------------------------------------------------------|------------------------------------------------------------|---------------------------------------------------------------------------------------------------------------------------------|-----------------------------------|
| Shouman et al; 2020   | Peer-reviewed      | Patients exposed to COVID-19 (ambulatory)            | 228                  | 112             | Mean age 38.72 ± 15.94, male 51.3%, HTN 9.5%, DM 7.6%, CKD 1%, asthma 3%, CHD 2.3% | Ivermectin 15 to 24 mg twice (second dose at day 3)                                             | No intervention                                            | NR                                                                                                                              | NR                                |
| Chowdhury et al; 2020 | Pre-print          | Patients with mild to moderate COVID-19 (ambulatory) | 63                   | 62              | Mean age 33.9 ± 14.1, male 72.4%                                                   | Ivermectin plus doxycycline 200 µg/kg single dose + 100 mg BID for 10 days and                  | HCC 200 mg daily for 10 days + AZT 500 mg daily for 5 days | NR                                                                                                                              | NR                                |
| Podder et al; 2020    | Peer-reviewed      | Patients with mild to moderate COVID-19 (ambulatory) | 32                   | 30              | Mean age 39.16 ± 12.07, male 71%                                                   | Ivermectin 200 µg/kg once + SOC                                                                 | SOC                                                        | Antipyretics, cough suppressants, and capsule doxycycline (100 mg every 12 hours for seven days)                                | NR                                |
| Hashim et al; 2020    | Pre-print          | Patients with mild to severe COVID-19 (hospitalized) | 70                   | 70              | Mean age 48.7 ± 8.6, male 52%                                                      | Ivermectin 200 µg/kg two or three doses + doxycycline 100 mg twice a day for 5 to 10 days + SOC | SOC                                                        | Vitamin C 1000 mg twice/ day and Zinc 75-125 mg/day and Vitamin D3 5000IU/day plus Dexamethasone 6 mg/day or methylprednisolone | Steroids 100%, azithromycin 100%, |

|                                              |               |                                                        |     |     |                                                                                    |                                                                              |                                                    |                                                                                                                                                                                                                     |    |
|----------------------------------------------|---------------|--------------------------------------------------------|-----|-----|------------------------------------------------------------------------------------|------------------------------------------------------------------------------|----------------------------------------------------|---------------------------------------------------------------------------------------------------------------------------------------------------------------------------------------------------------------------|----|
|                                              |               |                                                        |     |     |                                                                                    |                                                                              |                                                    | ne 40mg twice per day, if needed                                                                                                                                                                                    |    |
| Mahmud et al; 2020                           | Peer-reviewed | Patients with mild to moderate COVID-19 (hospitalized) | 200 | 200 | Mean age 39.6 ± 13.2, male 58.8%, HTN 14%, DM 13%, asthma 5%, CKD 2%               | Ivermectin plus doxycycline 12 mg once + 100 mg twice a day for 5 days + SOC | Placebo + SOC                                      | Paracetamol, antihistamines, cough suppressants, vitamins, low molecular weight heparin, remdesivir injection                                                                                                       | NR |
| Elgazzar et al (mild); <sup>151</sup> 2020   | Pre-print     | Patients with mild to moderate COVID-19 (hospitalized) | 100 | 100 | Mean age 55.2 ± 19.8, male 69.5%, HTN 11.5%, DM 14.5%, COPD %, asthma 5.5%, CHD 4% | Ivermectin 400 µg/kg once for 4 days + SOC and 100 patients assigned to      | HQC 800 mg for one day and 400 mf for 4 days + SOC | Azithromycin 500mg OD for 6 days, Paracetamol 500mg PRN, vitamin C 1gm OD, Zinc 50 mg OD, Lactoferrin 100mg sachets BID , Acetylcystein 200mg t.d.s & prophylactic or therapeutic anticoagulation if D-dimer > 1000 | NR |
| Elgazzar et al (severe); <sup>151</sup> 2020 | Pre-print     | Patients with severe COVID-19 (hospitalized)           | 100 | 100 | Mean age 39.6 ± 13.2, male 58.8%, HTN 14%, DM 13%, asthma 5%, CKD 2%               | Ivermectin 400 µg/kg once for 4 days + SOC                                   | HQC 800 mg for one day and 400 mg for 9 days + SOC | Azithromycin 500mg OD for 6 days, Paracetamol 500mg PRN,                                                                                                                                                            | NR |

|                                                                  |                   |                                                                               |     |     |                                                                                                            |                                                                                   |     |                                                                                                                                                                                                                                                |    |
|------------------------------------------------------------------|-------------------|-------------------------------------------------------------------------------|-----|-----|------------------------------------------------------------------------------------------------------------|-----------------------------------------------------------------------------------|-----|------------------------------------------------------------------------------------------------------------------------------------------------------------------------------------------------------------------------------------------------|----|
|                                                                  |                   |                                                                               |     |     |                                                                                                            |                                                                                   |     | <p>vitamin C 1gm<br/>OD, Zinc 50 mg<br/>OD, Lactoferrin<br/>100mg sachets<br/>BID , Acetylcystein<br/>200mg sachets<br/>t.d.s , prophylactic<br/>or therapeutic<br/>anticoagulation if<br/>D-dimer &gt; 1000<br/>and systemic<br/>steroids</p> |    |
| <p>Elgazzar et al<br/>(prophylaxis);<sup>1</sup><br/>51 2020</p> | Pre-print         | <p>People<br/>exposed to<br/>SARS-COV-2<br/>infection<br/>(ambulatory)</p>    | 100 | 100 | <p>Mean age: 57.2, male<br/>73.5%, DM 17%, HTN<br/>14.5%, CHD 2%, asthma<br/>4.5%</p>                      | <p>Ivermectin 400<br/>µgm/kg twice (second<br/>dose after one week) +<br/>SOC</p> | SOC | <p>Personal<br/>protective<br/>measures (PPM):<br/>hand hygiene,<br/>social distance<br/>measures,<br/>avoiding touching<br/>the eyes, nose,<br/>and, face masks,<br/>gloves, respiratory<br/>etiquette and self-<br/>isolation</p>            | NR |
| <p>Krolewiecki et<br/>al;<sup>152</sup> 2020</p>                 | Peer-<br>reviewed | <p>Patients with<br/>mild to<br/>moderate<br/>COVID-19<br/>(hospitalized)</p> | 30  | 15  | <p>Mean age 40.9 ± 12.5,<br/>male 56%, HTN 13.3%, DM<br/>15.5%, COPD and asthma<br/>11.1%, obesity 38%</p> | <p>Ivermectin 0.6 mg/kg<br/>for 5 days + SOC</p>                                  | SOC | NR                                                                                                                                                                                                                                             | NR |

|                                     |               |                                                                        |     |    |                                                                    |                                                                                                                                                                                                       |                           |                                           |                |
|-------------------------------------|---------------|------------------------------------------------------------------------|-----|----|--------------------------------------------------------------------|-------------------------------------------------------------------------------------------------------------------------------------------------------------------------------------------------------|---------------------------|-------------------------------------------|----------------|
| Niaee et al; <sup>153</sup> 2020    | Pre-print     | Patients with mild to severe COVID-19 (hospitalized)                   | 120 | 60 | Median age 56 ± 20, male 50%                                       | Ivermectin 200 microg/kg once + SOC or Ivermectin 200 microg/kg daily for 3 days + SOC or Ivermectin 400 microg/kg once + SOC or Ivermectin 400 microg/kg once + 200 microg/kg daily for 2 days + SOC | SOC or placebo + SOC      | Hydroxychloroquine 200mg/kg twice per day | NR             |
| Ahmed et al; <sup>154</sup> 2020    | Peer-reviewed | Patients with mild to moderate COVID-19 (hospitalized patients)        | 24  | 24 | Mean age 42, male 46%,                                             | Ivermectin 12 mg a day for 5 days or ivermectin 12 mg a day for 5 days + doxycycline 100 mg and                                                                                                       | placebo                   | NR                                        | NR             |
| Chaccour et al; 2020                | Peer-reviewed | Patients with mild COVID-19 (early within 3 days of onset, ambulatory) | 12  | 12 | Median age 26, male 50%,                                           | Ivermectin 400 microg/kg                                                                                                                                                                              | placebo                   | NR                                        | NR             |
| Chachar et al; <sup>156</sup> 2020  | Peer-reviewed | Patients with mild COVID-19 (ambulatory)                               | 25  | 25 | Mean age 41.8±15.7, male 62%, HTN 26%, DM 40%, obesity 12%, CHD 8% | Ivermectin 36mg once + SOC                                                                                                                                                                            | SOC                       | NR                                        | NR             |
| Babalola et al; <sup>157</sup> 2020 | Peer-reviewed | Patients with mild to                                                  | 21  | 20 | Mean age 44.1 ± 14.7, male 69.4%, HTN 14.5%,                       | Ivermectin 12 mg a week + SOC, or                                                                                                                                                                     | lopinavir-ritonavir + SOC | Zinc 62%                                  | Steroids 3.2%, |

|                                   |               |                                                              |     |     |                                                                                                                                            |                                                                                                             |               |                                                                         |                                                                            |
|-----------------------------------|---------------|--------------------------------------------------------------|-----|-----|--------------------------------------------------------------------------------------------------------------------------------------------|-------------------------------------------------------------------------------------------------------------|---------------|-------------------------------------------------------------------------|----------------------------------------------------------------------------|
|                                   |               | severe COVID-19 (ambulatory and hospitalized)                |     |     | DM 3.2%                                                                                                                                    | ivermectin 24 mg a week for 2 weeks + SOC                                                                   |               |                                                                         |                                                                            |
| Kirti et al; 2020                 | Pre-print     | Patients with mild to moderate COVID-19 (hospitalized)       | 55  | 57  | Mean age 52.5 ± 14.7, male 72.3%, HTN 34.8%, DM 35.7%, COPD 0.9%, asthma 0.9%, CHD 8.9%, CKD 2.7%, cerebrovascular disease 0%, cancer 5.4% | Ivermectin 24mg divided in two doses + SOC                                                                  | Placebo + SOC | Steroids 100%, HCQ 100%                                                 | remdesivir 20.5%, tocilizumab 6.3%, convalescent plasma 13.4%              |
| Chahla et al; 2020                | Pre-print     | People exposed to SARS-COV-2 infection (ambulatory)          | 117 | 117 | Median age 38 ± 12.5, male 42.7%, HTN 9%, DM 7.3%, CKD 2.1%, obesity 11.9%                                                                 | Ivermectin + iota-carrageenan 12mg a week + 6 sprays a day for 4 weeks + SOC and                            | SOC           | Standard biosecurity care and personal protective equipment (PPE)       | NR                                                                         |
| Mohan et al; <sup>159</sup> 2020  | Pre-print     | Patients with mild to moderate COVID-19 (hospitalized)       | 100 | 52  | Mean age 35.3 ± 10.4, male 88.8%, HTN 11.2%, DM 8.8%, CHD 0.8%                                                                             | Ivermectin 12 mg (equivalent to 200 µg/kg) elixir + SOC or Ivermectin 24 mg (equivalent to 400 µg/kg) + SOC | Placebo + SOC | NR                                                                      | Steroids 14.4%, remdesivir 1.6%, hydroxychloroquine 4%, azithromycin 11.2% |
| Samaha et al; <sup>159</sup> 2020 | Peer-reviewed | Patients with asymptomatic SARS-COV-2 infection (ambulatory) | 50  | 50  | Mean age: 31.78 ± 7.85, male 50%, HTN 8%, DM 6%                                                                                            | Ivermectin 0.2 mg/kg once + SOC                                                                             | SOC           | Zinc (30–50 mg/day) and Vitamin C (500 mg BID, twice daily) supplements | NR                                                                         |

|                                             |               |                                                          |     |     |                                                                                                     |                                       |                      |                                                                                                                                                                      |                                          |
|---------------------------------------------|---------------|----------------------------------------------------------|-----|-----|-----------------------------------------------------------------------------------------------------|---------------------------------------|----------------------|----------------------------------------------------------------------------------------------------------------------------------------------------------------------|------------------------------------------|
| Bukhari et al; <sup>160</sup> 2020          | Pre-print     | Patients with mild to moderate COVID-19 (hospitalized)   | 50  | 50  | Mean age: 40.6, males 73%, HTN 14%, DM 11.6%, CHD 5.8%                                              | Ivermectin 12 mg once + SOC           | SOC                  | vitamin C 500 mg once daily, vitamin D3 200,000 IU once weekly, Paracetamol 500 mg if necessary.                                                                     | NR                                       |
| Okumus et al; <sup>161</sup> 2021           | Peer-reviewed | Patients with severe COVID-19 (hospitalized)             | 36  | 30  | Mean age 62 ± 12, male 60.6%, HTN 45%, DM 31.6%, COPD 15%, CHD 21.6%, cancer 1.6%                   | Ivermectin 0.2 mg/kg for 5 day + SOC  | SOC                  | Hydroxychloroquine (2x400mg loading dose followed by 2x200mg for 5 days), favipiravir (2x1600mg loading dose followed by 2x600mg maintenance dose, po, total 5 days) | NR                                       |
| Beltran-Gonzalez et al; <sup>126</sup> 2021 | Pre-print     | Patients with moderate to severe COVID-19 (hospitalized) | 36  | 37  | Mean age 54 ± 23.5, male 46.8%, HTN 19.1%, DM 9.6%, COPD 1%, CHD 7.4%, cerebrovascular disease 5.3% | Ivermectin 12-18 mg once              | Placebo              | dexamethasone, 6 mg IV every 24 hours, unfractionated heparin                                                                                                        | Steroids 9.6%, lopinavir-ritonavir 44.7% |
| Lopez-Medina et al; <sup>162</sup> 2021     | Peer-reviewed | Patients with mild COVID-19 (ambulatory)                 | 238 | 238 | Median age 37 ± 19, male 42%, HTN 13.4%, DM 5.5%, COPD 3%, CHD 1.7%, cancer %, obesity 18.9%        | Ivermectin 300 µg/kg a day for 5 days | Placebo              | NR                                                                                                                                                                   | Steroids 4.5%                            |
| Bermejo                                     | Peer-         | Patients with                                            | 53  | 54  | Mean age 53.4 ± 15.6,                                                                               | Ivermectin 42mg                       | CQ 900 mg for 1 day, | Azithromycin (500                                                                                                                                                    | Steroids 98%                             |

|                                        |               |                                                          |     |     |                                                                                |                                                                                   |                                                                     |                                                                                                                      |                |
|----------------------------------------|---------------|----------------------------------------------------------|-----|-----|--------------------------------------------------------------------------------|-----------------------------------------------------------------------------------|---------------------------------------------------------------------|----------------------------------------------------------------------------------------------------------------------|----------------|
| Galan et al; <sup>128</sup><br>2021    | reviewed      | severe to critical COVID-19 (hospitalized)               |     |     | male 58.2%, HTN 43.4%, DM 28.1%, COPD 5.3%, CKD 2.5%, cancer 3%, obesity 37.5% |                                                                                   | and 450 mg for 4 days or HCQ 800 mg for 1 day and 400 mg for 4 days | mg 1× for 5 days) and ceftriaxone (1 g 2× for 7 days). Oseltamivir (75 mg 2× for 5 days) Proportions NR Steroids 98% |                |
| Pott-Junior et al; <sup>163</sup> 2021 | Peer-reviewed | Patients with mild to severe COVID-19 (hospitalized)     | 28  | 7   | Mean age 49.4 ± 14.6, male 45.2%                                               | Ivermectin 100 + SOC or ivermectin 200 mc/kg + SOC or ivermectin 400 mcg/kg + SOC | SOC                                                                 | NR.                                                                                                                  | Steroids 32.3% |
| Kishoria et al; <sup>164</sup> 2021    | Peer-reviewed | Patients with asymptomatic to mild COVID-19 (ambulatory) | 19  | 16  | Mean age 38 ±, male 66%                                                        | Ivermectin 12mg single dose + SOC                                                 | SOC                                                                 | Hydroxychloroquine 400 mg twice a day, Paracetamol 500mg as required, Vitamin C 1 tab twice a day; for five days     | NR             |
| Seet et al; <sup>129</sup> ; 2021      | Peer-reviewed | People exposed to SARS-COV-2 infection. (ambulatory)     | 709 | 633 | Mean age 33, male 100%, hypertension 0.8%, diabetes 0.3%                       | Ivermectin 12mg once                                                              | vitamin C                                                           | NR                                                                                                                   | NR             |
| Shahbaznejad et al; 2020               | Peer-reviewed | Patients with moderate to critical COVID-19              | 35  | 38  | Mean age 46.4 ± 22.5, male 52.2%                                               | Ivermectin 0.2 mg/kg once + SOC                                                   | SOC                                                                 | Chloroquine 75.4%, lopinavir-ritonavir 79.7%, antibiotics 89.8%                                                      | NR             |

|                            |               |                                                                  |     |     |                                                 |                                                          |     |                                                                                                                                                                  |    |
|----------------------------|---------------|------------------------------------------------------------------|-----|-----|-------------------------------------------------|----------------------------------------------------------|-----|------------------------------------------------------------------------------------------------------------------------------------------------------------------|----|
|                            |               | (hospitalized)                                                   |     |     |                                                 |                                                          |     |                                                                                                                                                                  |    |
| Abd-Elsalam S et al.; 2021 | Peer-reviewed | Patients with mild to moderate COVID-19 infection (hospitalized) | 82  | 82  | Mean age 40.9 ± 16.5, male 50%, HTN 20%, DM 16% | Ivermectin 12 mg a day for 3 days + SOC                  | SOC | Paracetamol, oxygen, fluids (according to the condition of the patient), empiric antibiotic, oseltamivir if needed (75 mg/12 h for 5 days)                       | NR |
| Biber et al; 2021          | Pre-print     | Patients with mild recent onset COVID19 (ambulatory)             | 47  | 42  | Mean age 35 ± 19, male 78.4%                    | Ivermectin 48 to 55 mg administered for three days + SOC | SOC | NR                                                                                                                                                               | NR |
| Faisal et al; 2021         | Peer-reviewed | Patients with mild COVID-19 (ambulatory)                         | 50  | 50  | Mean age 46 ± 3, male 80%                       | Ivermectin 12 mg a day for 5 days + SOC                  | SOC | Paracetamol (500mg if needed), Vit C (500mg once a day for 15 days), zinc (20mg twice a day for 15 days) and Vit D (injection PO 200,000units once) supplements. | NR |
| Vallejos et al; 2021       | Peer-         | Patients with mild                                               | 250 | 251 | Mean age 42.5 ± 15.5, male 52.7%, hypertension  | Ivermectin 24 to 36mg (according to baseline             | SOC | NR                                                                                                                                                               | NR |



|  |          |                          |  |  |                                                                           |                                   |  |  |  |
|--|----------|--------------------------|--|--|---------------------------------------------------------------------------|-----------------------------------|--|--|--|
|  | reviewed | COVID-19<br>(ambulatory) |  |  | 23.8%, diabetes 9.6%,<br>COPD 2.8%, asthma 7.2%,<br>CHD 1.8%, cancer 1.2% | bodyweight) divided in<br>2 doses |  |  |  |
|--|----------|--------------------------|--|--|---------------------------------------------------------------------------|-----------------------------------|--|--|--|

SOC: standard of care; NR: not registered; HTN: arterial blood hypertension; DM: diabetes mellitus; CKD: chronic kidney disease; COPD: chronic obstructive pulmonary disease; CHD: coronary heart disease; CQ: chloroquine; HCQ: hydroxychloroquine.
