# Supplementary material
Source: PubMed Central journal article supplement (PMC8684188)

**S2 Figure. Baseline prognostic factors balance between study arms**

**Male gender**

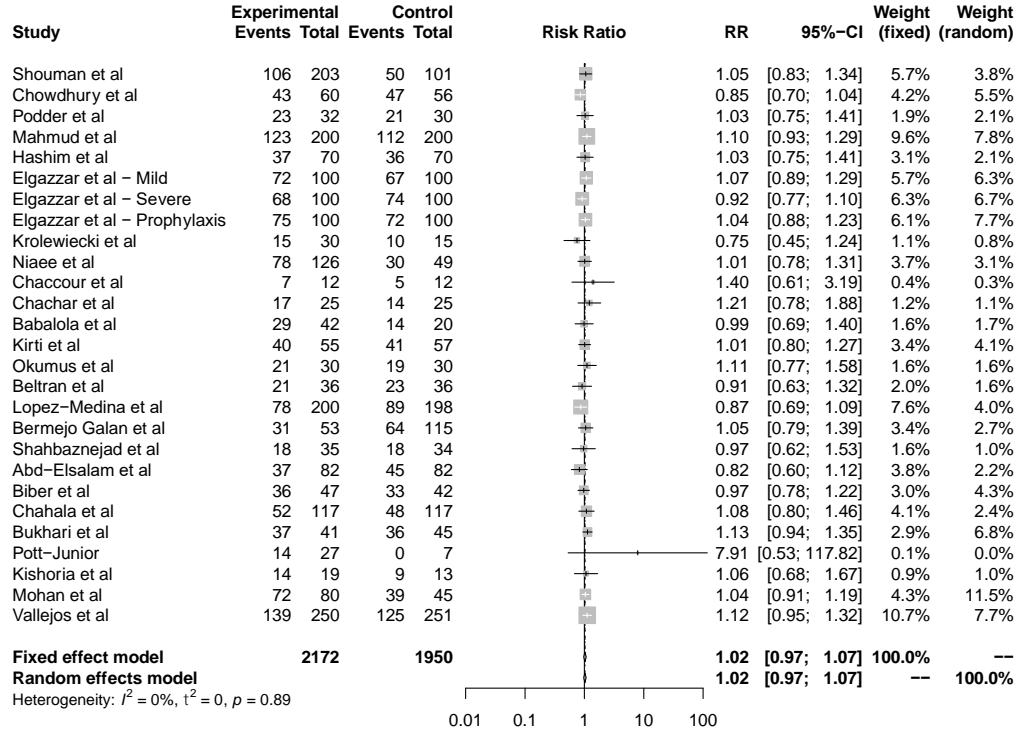

**Hypertension**

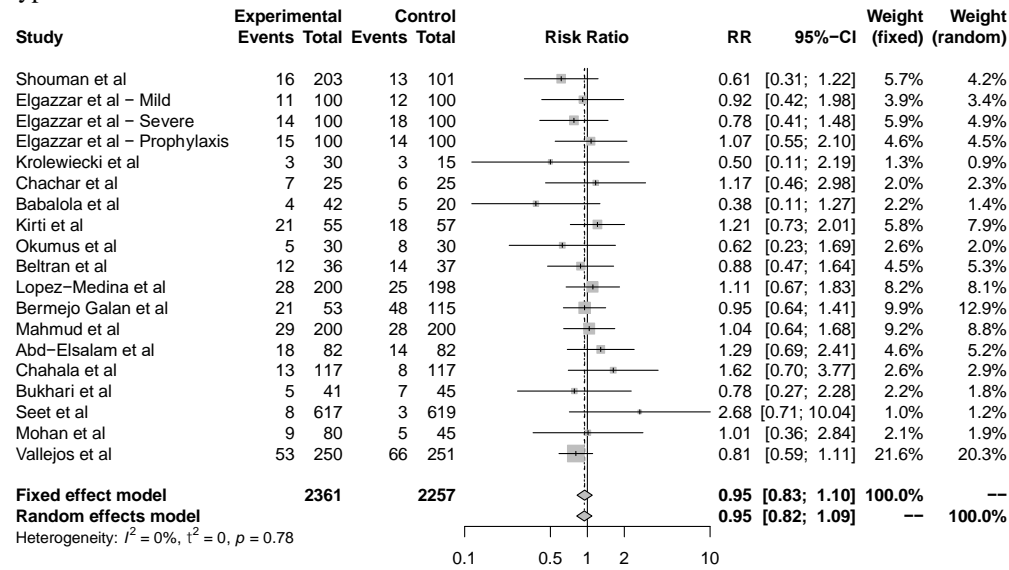

**Diabetes**

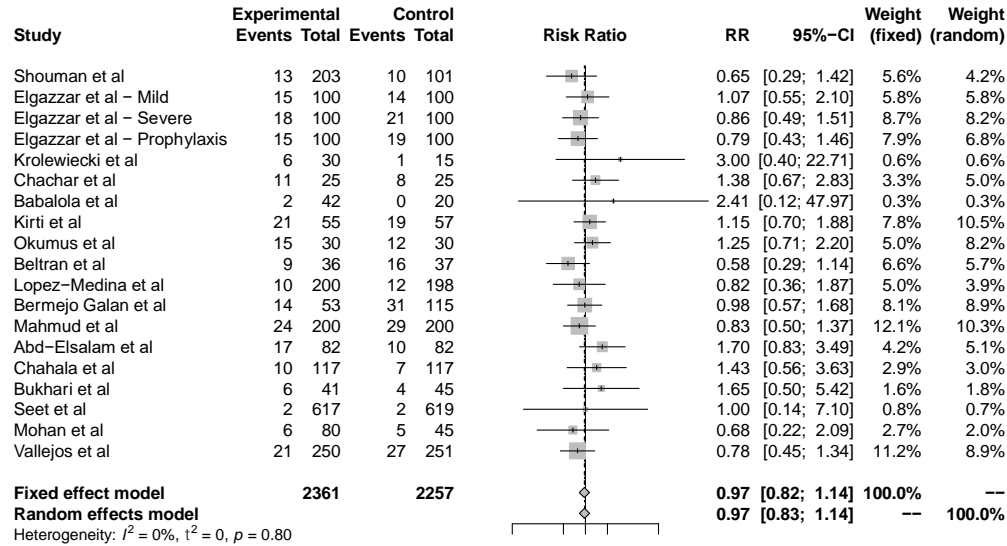

### Asthma

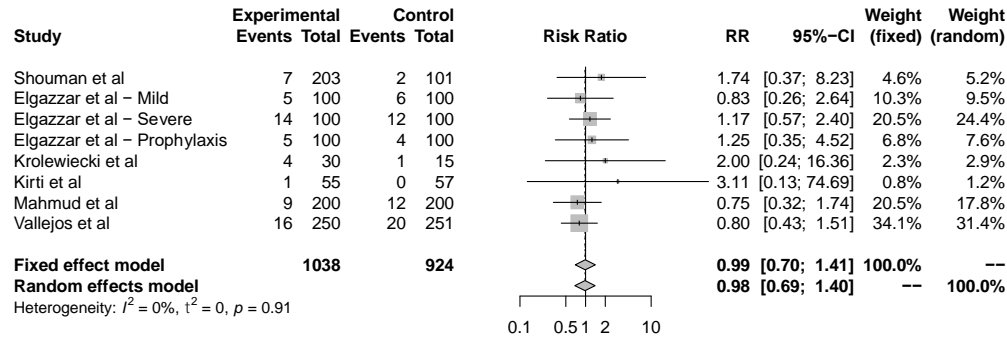

### Ischemic heart disease

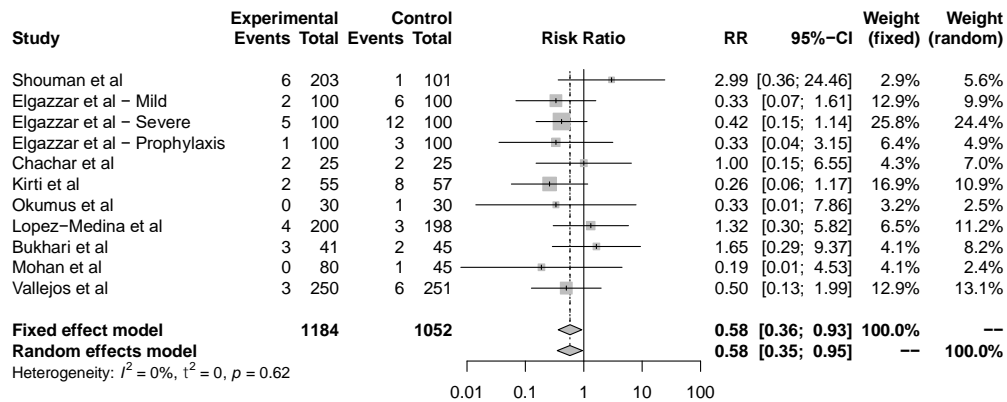

### Chronic kidney disease

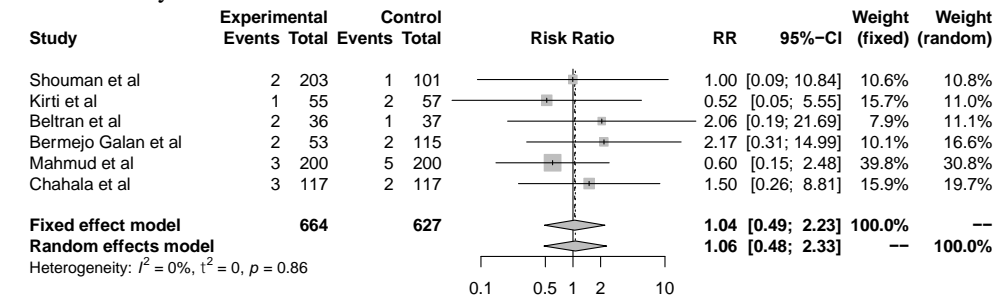

## Obesity

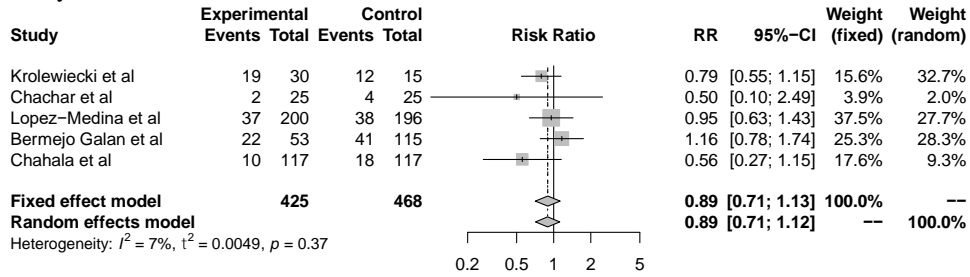

## Chronic pulmonary disease

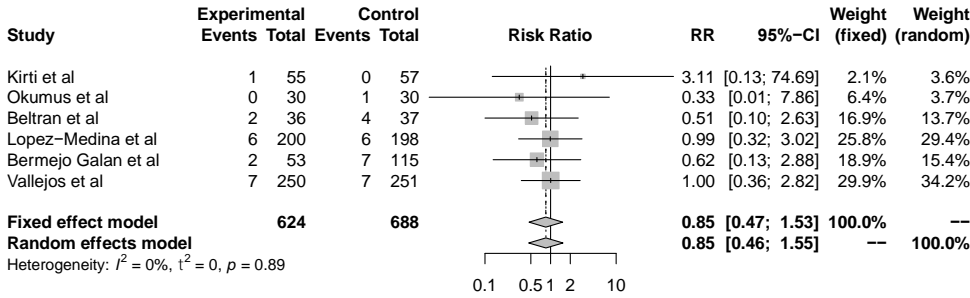

## Cancer

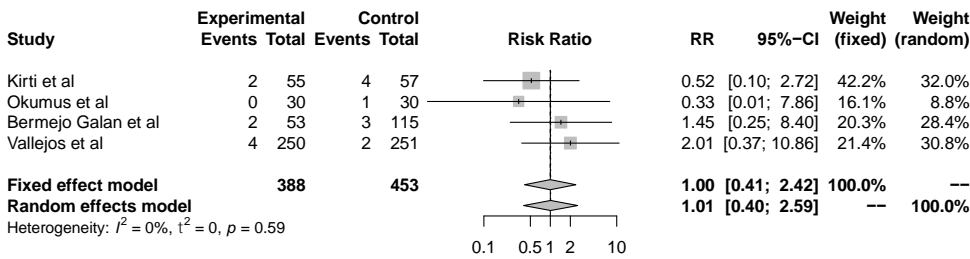

Supplement: mmc5.pdf [file mmc5.pdf]
